# Supplementary material
Source: PubMed Central journal article supplement (PMC4337863)
Supplement: NIHMS662578-supplement-Supplementary_data.pdf [file NIHMS662578-supplement-Supplementary_data.pdf]

Supplement Table 1. Genes differentially expressed between c1 and c5 (top 30)

| c1>c5     |                      |       | c1<c5      |                        |       |
|-----------|----------------------|-------|------------|------------------------|-------|
| Symbol    | Locus                | Ratio | Symbol     | Locus                  | ratio |
| RIN2      | 20p11.22             | 5.39  | SPRY1      | 4q28.1                 | 5.67  |
| PDZK1IP1  | 1p33                 | 4.90  | JAG1       | 20p12.2                | 5.27  |
| BCHE      | 3q26.1               | 4.84  | MAP2       | 2q34                   | 4.68  |
| DUSP4     | 8p12                 | 4.80  | COLEC12    | 18p11.32               | 4.26  |
| TM4SF1    | 3q25.1               | 4.79  | SP8        | 7p21.1                 | 3.91  |
| KCNH8     | 3p24.3               | 4.77  | CA13       | 8q21.2                 | 3.81  |
| RLN2      | 9p24.1               | 4.67  | LIN7A      | 12q21.31               | 3.77  |
| ASPH      | 8q12.3               | 4.57  | CNTN3      | 3p12.3                 | 3.60  |
| OR51E1    | 11p15.4              | 4.29  | C15orf21   | <b><u>15q21.1</u></b>  | 3.38  |
| CCL8      | 17q12                | 4.10  | ADAMTSL3   | <b><u>15q25.2</u></b>  | 3.30  |
| NAV3      | 12q21.2              | 4.00  | CBLN2      | 18q22.3                | 3.29  |
| MMP16     | 8q21.3               | 3.89  | TSPY1/4 /8 | Yp11.2                 | 3.23  |
| GPD2      | 2q24.1               | 3.74  | CYP11A1    | <b><u>15q24.1</u></b>  | 3.19  |
| RGS2      | <b><u>1q31.2</u></b> | 3.68  | ODAM       | 4q13.3                 | 3.18  |
| AQP3      | 9p13.3               | 3.66  | IGFBP3     | 7p12.3                 | 3.17  |
| TCEA3     | 1p36.12              | 3.38  | FRY        | 13q13.1                | 3.12  |
| BMPR1B    | 4q22.3               | 3.31  | WLS        | 1p31.3                 | 3.08  |
| NBPF10    | <b><u>1q21.2</u></b> | 3.27  | TMEM45A    | 3q12.2                 | 3.02  |
| WSB1      | 17q11.1              | 3.12  | SCIN       | 7p21.3                 | 2.98  |
| UGT2B17   | 4q13.2               | 3.11  | GPER       | 7p22.3                 | 2.95  |
| PLXDC2    | 10p12.31             | 3.02  | DHRS2      | 14q11.2                | 2.92  |
| FAM5C     | <b><u>1q31.1</u></b> | 2.95  | ALB        | 4q13.3                 | 2.83  |
| DIO1      | 1p32.3               | 2.95  | EPHX4      | 1p22.1                 | 2.82  |
| RALGAPA2  | 20p11.23             | 2.92  | SH3GL3     | <b><u>15q25.2</u></b>  | 2.79  |
| PSMD5     | 9q33.2               | 2.90  | MAPK13     | 6p21.31                | 2.74  |
| MAGEC2    | Xq27.2               | 2.89  | ID1        | 20q11.21               | 2.73  |
| TIMP2     | 17q25.3              | 2.87  | RBPMS2     | <b><u>15q22.31</u></b> | 2.67  |
| CCL2      | 17q12                | 2.83  | TWIST1     | 7p21.1                 | 2.59  |
| EGF       | 4q25                 | 2.82  | CD302      | 2q24.2                 | 2.55  |
| PTPN20A/B | 10q11.22             | 2.82  | ZBBX       | 3q26.1                 | 2.48  |

Genes on 1q and 15q are underlined
