# Supplementary material
Source: PubMed Central journal article supplement (PMC4337863)

Supplement figure 3

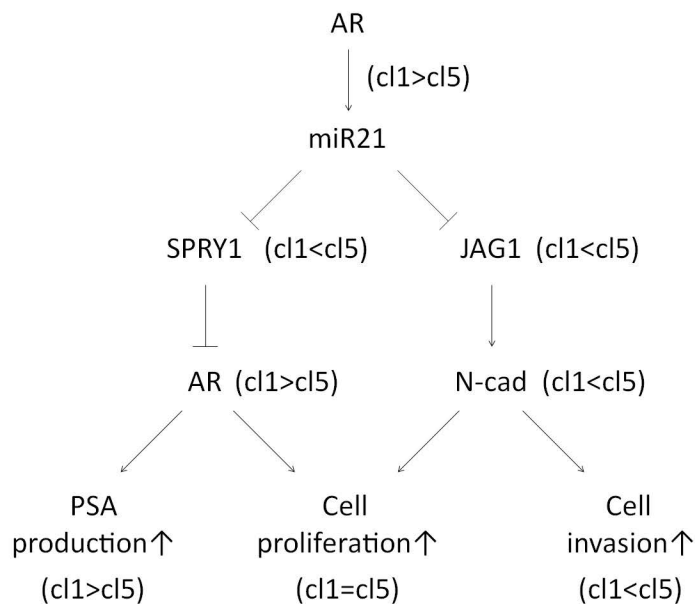

Supplement: NIHMS662578-supplement-Supplementary_data2.pdf [file NIHMS662578-supplement-Supplementary_data2.pdf]

**A**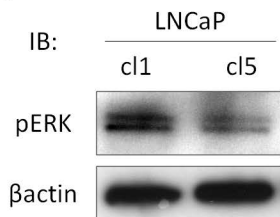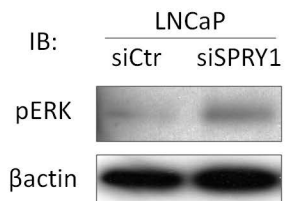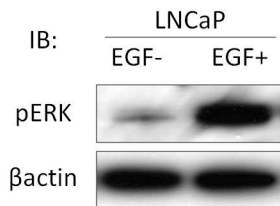**B**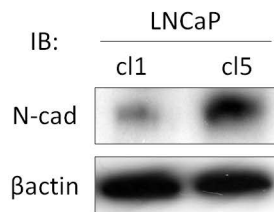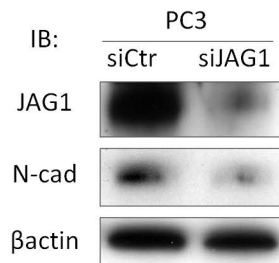

Supplement: NIHMS662578-supplement-Supplementary_data3.pdf [file NIHMS662578-supplement-Supplementary_data3.pdf]
